# Supplementary figures and images for: Preparation, Characterization and Antiviral Evaluation of Curcumin-PLGA and Curcumin-metal oxide nanocomposite against SARS-CoV-2
Source: Research Square preprint supplement (doi:10.21203/rs.3.rs-2239512/v1), 2022-11-29

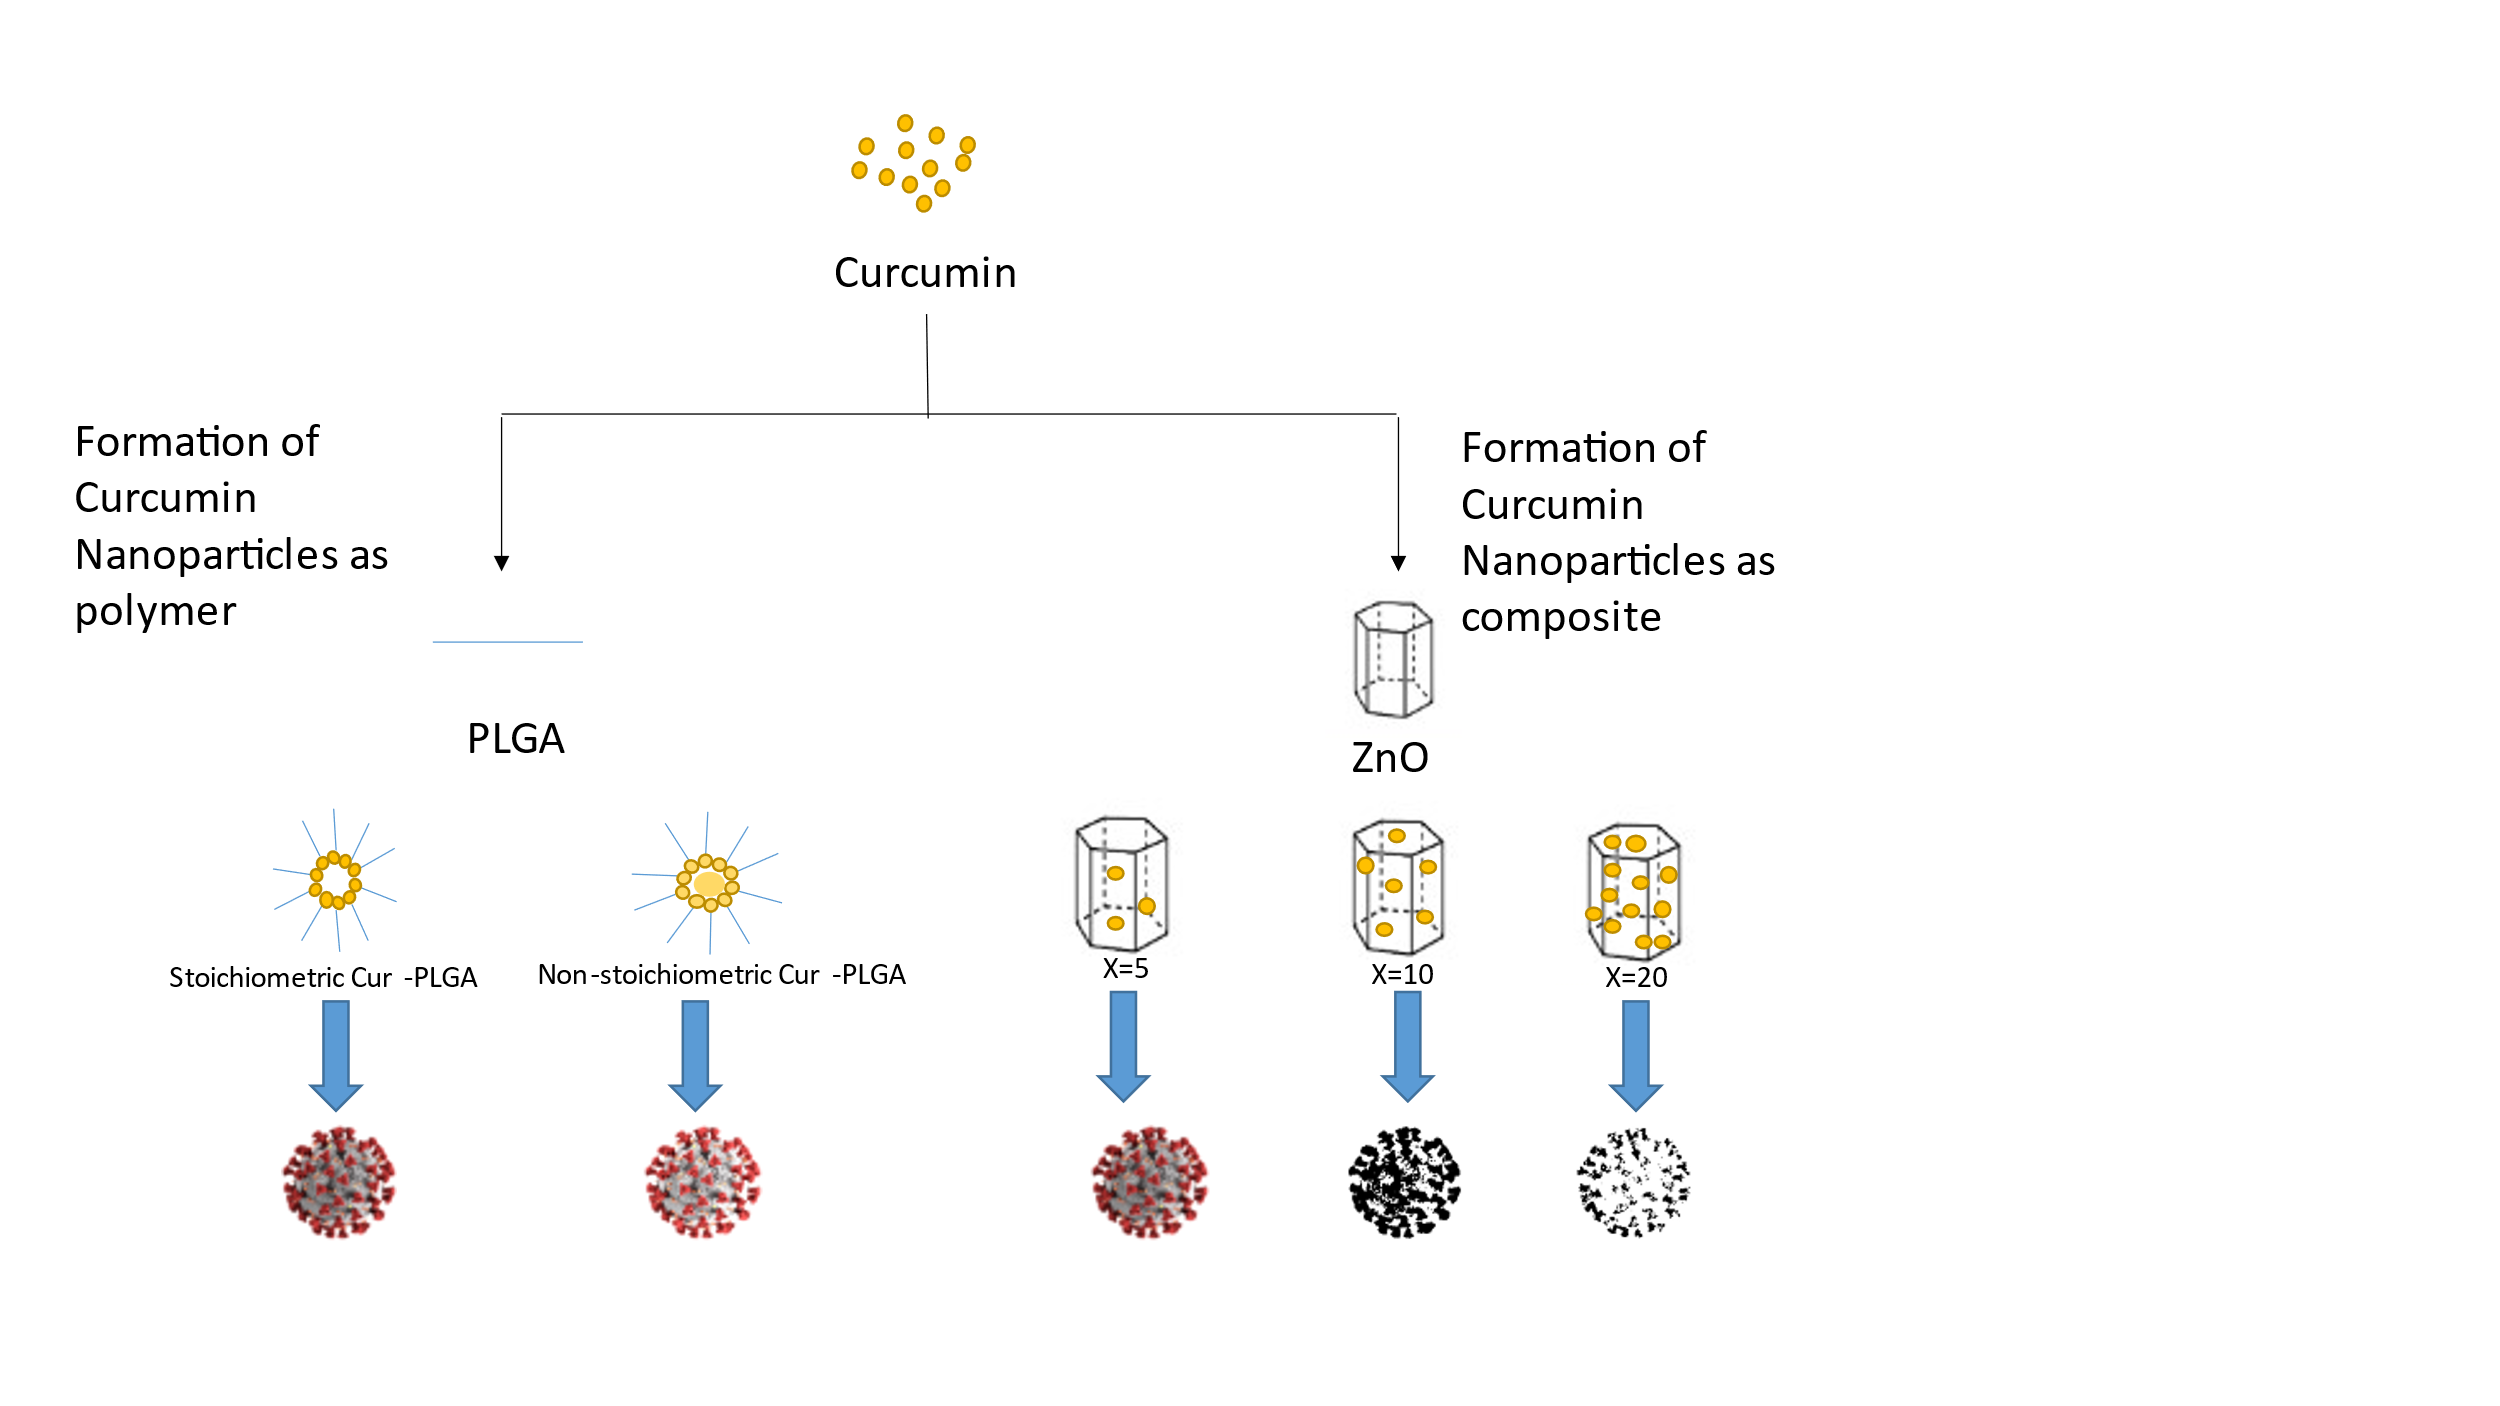
Graphical abstract

X is the percent of curcumin in Cur-ZnO nanocomposite

Supplement: Supplementary file 1 [file 98cca3e7da37924afeab4827.docx]
